1 **Genetic variation/evolution and differential host responses resulting from in-patient**  
2 **adaptation of *Mycobacterium avium***

3 **Running title:** Genetic evolution in Mav and differential host responses

4

5 **N. Kannan<sup>1,2</sup>, Y.- P. Lai<sup>3</sup>, M. Haug<sup>1,2,4</sup>, M. K. Lilleness<sup>1,2</sup>, S. S. Bakke<sup>1,2</sup>, A. Marstad<sup>1,2</sup>, H.**  
6 **Hov<sup>2,5</sup>, T. Naustdal<sup>6</sup>, J. E. Afset<sup>2,7</sup>, T. R. Ioerger<sup>3</sup>, T. H. Flo<sup>1,2</sup>\*, M. Steigedal<sup>1,2,7</sup>##**

7 <sup>1</sup> Centre of Molecular Inflammation Research (CEMIR),

8 <sup>2</sup> Department of Clinical and Molecular Medicine, Norwegian University of Science and  
9 Technology (NTNU), Trondheim, Norway

10 <sup>3</sup> Department of Computer Science and Engineering, Texas A&M University, College Station,  
11 TX, USA.

12 <sup>4</sup> Department of Infection, St. Olavs University Hospital, Trondheim, Norway

13 <sup>5</sup> Department of Pathology, St. Olavs University Hospital, Trondheim, Norway

14 <sup>6</sup> Levanger Hospital, Health Trust Nord-Trøndelag, Department of Internal Medicine, Levanger,  
15 Norway

16 <sup>7</sup> Department of Medical Microbiology, St. Olavs University Hospital, Trondheim, Norway,

17 \* Authors contributed equally

18 **Correspondence:**

19 Magnus Steigedal, Centre of Molecular Inflammation Research (CEMIR), Norwegian University  
20 of Science and Technology (NTNU), Trondheim, Norway

21 Word count: Abstract: 196, Importance: 146, Main text: 4934

---

# magnus.steigedal@ntnu.no

22 **ABSTRACT**

23 *Mycobacterium avium* (Mav) complex (MAC) are characterized as non-tuberculosis  
24 mycobacteria and are pathogenic mainly in immunocompromised individuals. MAC strains show  
25 a wide genetic variability, and there is growing evidence suggesting that genetic differences may  
26 contribute to a varied immune response that may impact on the infection outcome. The current  
27 study aimed to characterize the genomic changes within Mav isolates collected from single  
28 patients over time and test the host immune responses to these clinical isolates.  
29 Pulsed field gel electrophoresis and whole genome sequencing was performed on 40 MAC  
30 isolates isolated from 15 patients at the Department of Medical Microbiology at St. Olavs  
31 Hospital in Trondheim, Norway. Patients (4, 9 and 13) who contributed more than two isolates  
32 were selected for further analysis. These isolates exhibited extensive sequence variation in the  
33 form of single nucleotide polymorphisms (SNPs), suggesting that Mav accumulates mutations at  
34 high rates during persistent infections. Infection of murine macrophages and mice with sequential  
35 isolates from patients showed a tendency towards increased persistence and down-regulation of  
36 inflammatory cytokines by host-adapted Mav strains. The study revealed rapid genetic evolution  
37 of Mav in chronically infected patients accompanied with change in virulence properties of the  
38 sequential mycobacterial isolates.

39 **IMPORTANCE**

40 MAC are a group of opportunistic pathogens, consisting of Mav and *M. intracellulare* species.  
41 Mav is found ubiquitously in the environment. In Mav infected individuals, Mav has been known  
42 to persist for long periods of time, and anti-mycobacterial drugs are unable to effectively clear the  
43 infection. The continued presence of the bacteria, could be attributed to either a single persistent  
44 strain or reinfection with the same or different strain. We examined sequential isolates collected

45 over time from Mav infected individuals and observed that most patients carried the same strain  
46 overtime and were not re infected. We observed high rates of mutation within the serial isolates,  
47 accompanied with changes in virulence properties. In the light of increase in incidence of MAC  
48 related infections, this study highlights the possibility that host adapted Mav undergo genetic  
49 modifications to cope with the host environment and thereby persisting longer.

50  
51 **KEYWORDS:** *Mycobacterium avium*, mutation rate, genetic evolution, host immune response,  
52 clinical isolates, mouse infections.

53

54

55 *Mycobacterium avium* (Mav) complex (MAC) are a group of opportunistic pathogens, consisting  
56 of Mav and *M intracellulare* species, which primarily affect individuals with weakened immune  
57 systems (1–4). However, even healthy individuals can be infected by Mav and in healthy children  
58 the disease manifests as lymphadenitis (5–7). Mav infections are very hard to treat, and many  
59 anti-mycobacterial drugs fail to clear the infection even after prolonged treatment of 18-24  
60 months (8, 9).

61 The host response to *Mycobacterium tuberculosis* (Mtb) has been extensively examined  
62 over the years. Infections with non-tuberculous mycobacteria are less well characterized,  
63 although the focus has been increasing in recent years (10). Mav lacks several of the key  
64 virulence factors of Mtb, but can still establish chronic infections. Macrophages are central in  
65 defense against mycobacterial infections but they also end up hosting the pathogens as these  
66 manipulate cell-autonomous host defenses. When infected, macrophages release interleukin (IL)-  
67 12 that aids in activation of T cells, leading to interferon gamma (IFN $\gamma$ )-producing CD4+ T  
68 helper 1 (Th1) cells, thought to be essential in fighting mycobacterial infections (11). IFN $\gamma$  acts  
69 back on the macrophages and strengthens their antimicrobial capacities. Other factors such as  
70 tumor necrosis factor alpha (TNF $\alpha$ ) produced by activated macrophages and T cells, are not only  
71 important in enhancing the microbicidal capacity but also in inducing the adaptive response, in  
72 synergy with IFN $\gamma$  (12, 13). Pro-inflammatory cytokines like IL-6 and IL-1 $\beta$  have also been  
73 shown to play a role in mycobacterial infections (11, 14–17). IL-1 $\beta$  along with IL-6 and TNF $\alpha$   
74 have been observed to be suppressed by the most virulent strains of Mav (18).

75 The genome of Mtb was thought to be relatively unaffected by the host environment (19),  
76 but recent data from macaques suggest that Mtb acquires mutations during long term Mtb  
77 infection (20). Genomic analysis has revealed greater genomic heterogeneity in Mav than can be

78 seen in *Mtb* (21–23). This is probably a consequence of the variety of niches that *Mav* species  
79 occupy (such as soil, fresh water, showerheads etc.), and also indicates that *Mav* may be more  
80 prone to variability than *Mtb*. Genetic change within an infected patient has not been investigated  
81 for *Mav* infection. The effect of genetic variation on virulence and pathogenesis is even less  
82 understood. An early study on *Mav* virulence found that strains varied in virulence depending  
83 upon where they were isolated from, despite having very similar genomic composition (24, 25).  
84 Genetic changes could be selected for when they provide increased virulence and persistence. We  
85 hypothesized that the hostile environment during chronic *Mav* infections in humans would result  
86 in genetic changes of the infecting *Mav* strain, and possibly alter the virulence of the strain. In the  
87 present study, we investigated genetic changes by sequencing *Mav* isolates sampled from  
88 individual patients over time, and studied host responses to these sequential isolates *in vitro* in  
89 primary mouse macrophages and *in vivo* in mice.

90

## 91 **RESULTS**

### 92 **Sequential sampling from patients with MAC infection shows persistent infection over time.**

93 For this study, 15 patients diagnosed with MAC disease were monitored over a period of one  
94 month to 3 years. At least two consecutive bacterial samples were isolated from all patients with  
95 at least one month interval, providing a total of 40 isolates (Table S1). To differentiate between  
96 the two MAC species (*Mav* and *M. intracellulare*), melting curve analyses of 16S rRNA from the  
97 40 isolates were compared to type strains of *Mtb*, *Mav* and *M. intracellulare* (Fig. S1). Thirty-  
98 one isolates were identified as *Mav* and nine as *M. intracellulare*. All patients had the same  
99 species identified in all isolates, suggesting either the same bacterium persists over time or  
100 reinfection with the same species. To evaluate whether strains isolated from a patient at different  
101 times represented persistent infection or reinfection with a new strain of the same species, we

102 performed PFGE using SnaBI restriction analysis (Fig1a). Sequential isolates were found to be of  
103 indistinguishable genotypes in 13 of the 15 patients, suggesting persistent infection by a single  
104 bacterial strain. Phylogenetic cluster analyses based on PFGE profiles were carried out for each  
105 species separately (Fig. 1a). All Mav and *M. intracellulare* isolates showed distinct and similar  
106 SnaBI profiles. For the patients 4, 9 and 13, where there are more than two consecutive Mav  
107 isolates from the same patient, we observed that most of the isolates have identical (patient 4 and  
108 9) or very similar (Patient 13) SnaBI profiles, suggesting the presence of a single strain persisting  
109 over time. For patient 13, the presence of an extra band in the DNA profile of isolates 13.3 and  
110 13.4 indicates that a genetic change occurred sometime between sampling of isolates 13.2 and  
111 13.3.

112 **Whole-genome sequencing reveals accumulation of SNPs and genetic variation in Mav**  
113 **during persistent infection.** Genetic changes in some of the serial intra-patient isolates were  
114 observed from PFGE analysis. To further investigate genetic changes, whole-genome sequencing  
115 (WGS) of the isolates was performed. The genome sequences were analysed for polymorphisms  
116 like SNPs, using Mav 104 as a reference strain, and a phylogeny tree was constructed. We  
117 observed that the isolates from patient 9 were closely related to Mav 104, whereas isolates from  
118 patient 4 and 13 were closely related to Mav strain subsp. *hominissuis* H87 (26) (Fig. 1b).  
119 Overall, the genome sequences of intra-patient isolates were highly similar, with only 0-17 SNPs  
120 between any intra-patient pair, strongly supporting that each patient maintained a unique  
121 infecting strain (Fig. 2).

122 To establish the genetic variation between intra-patient isolates of Mav, we considered  
123 patients where more than two consecutive isolates were collected. Patient 4 and 9 provided six  
124 isolates, whereas patient 13 provided four isolates. The mutation rate in intra-patient isolates was  
125 determined by calculating the maximum-likelihood estimate (ML) for the accumulation of SNPs

126 over time. The ML estimates of the rates were 6.92 (95% confidence interval (CI): 4.81-9.64),  
127 2.40 (95% CI: 1.24-4.19) and 12.39 SNPs per genome per year (95% CI: 8.73-17.07) for patient  
128 4, 9 and 13 respectively. This results in an estimated mutation rate of  $1.41 \times 10^{-6}$ ,  $0.44 \times 10^{-6}$  and  
129  $2.41 \times 10^{-6}$  SNPs per site per year for patients 4, 9 and 13 (Fig. 2a). These rates are higher than  
130 mutation rates among clinical isolates from related species, such as Mtb (~ 0.5 SNPs per genome  
131 per year) (27). For Mav infections, mutation rates within a single infected patient have not been  
132 studied previously.

133 In patient 4, a comparison of later isolates to the first isolate, 4.1, revealed an  
134 accumulation of 17 SNPs over a period of 1196 days. In addition, we observed that 13 of the  
135 SNPs were maintained in subsequent isolates, indicating a high degree of fixation of the  
136 mutations in the infecting strain (Fig. 2b). The accumulation of SNPs in isolates from patient 4  
137 steadily increased with time, with 9 SNPs observed at the second time-point (4.2, 390 days), 8 of  
138 these SNPs were maintained in all successive time points analysed. When 13.1 was used as a  
139 reference for isolates from patient 13, the subsequent isolates exhibited a similar accumulation of  
140 SNPs as in patient 4, with 17 SNPs in total detected within 4 isolates over a period of 798 days  
141 (Fig. 2b). The majority of SNPs occurred over the first year between isolate 13.1 and isolate 13.3,  
142 where 14 SNPs occurred that were conserved till the last isolate 13.4. For patient 9, the pattern of  
143 SNPs in consecutive isolates was different. Although a total of 13 SNPs were identified for the  
144 series of isolates, only 2 mutations were fixed in subsequent isolates. We observed no differences  
145 in preservation between synonymous and non-synonymous mutations that could explain the  
146 difference in the level of fixation in subsequent isolates (Table S2).

147 Since we observed an additional band in the PFGE for patient 13 (Fig 1a), we compared  
148 all the isolates from patient 13 including 13.1 to Mav 104 as an outgroup and observed that some  
149 SNPs occurring in 13.3 and 13.4 were associated with 13.1 and 13.2. In addition, sequencing

150 revealed that a putative prophage (MAV0799-MAV0845) appears to be deleted in 13.1 and 13.2,  
151 but not 13.3 and 13.4. These observations together indicate the presence of 2 subtypes that may  
152 have originated within patient 13. Due to lack of multiple samples at each time point, it is  
153 difficult to further substantiate this observation. Similar analysis was performed for patients 4 and  
154 9. For patient 9, the SNPs did not change with respect to Mav 104, however for patient 4, 4  
155 mutations now appeared to associate with 4.1 instead of 4.2-4.6 (Table S3). This suggests that  
156 there are 2 subtypes in patient 4 as well. The re-calculated mutation rates based on the  
157 assumption of sub lineages for patients 4 and 13, resulted in 6.6 and 7.1 SNPs per genome per  
158 year, respectively (Fig S5).

159 **Host-adaptation can change the ability of Mav to survive in murine bone marrow derived**  
160 **macrophages.** In order to evaluate whether changes within the isolates from patients 4, 9 and 13  
161 were a response to host adaptation, we first studied the ability of these bacteria to grow in culture  
162 (Fig. 3a). Only minor differences in growth rates were observed for isolates from patient 4 and 9.  
163 However, for patient 13 we observed relative growth impairment for the first isolate when  
164 compared to the other 3 isolates (Fig. 3a). Isolates were next compared for intracellular growth in  
165 murine macrophages over 7 days. Enumeration of bacteria (colony forming units, CFU) 2 hours  
166 post infection (p.i) suggested equal uptake for all isolates (Fig. S2). For patient 9 and 13, a  
167 significant increase in CFU between the first and the last isolate was observed (Fig. 3b-c). For  
168 patient 9, CFU at day 7 increased 1.7 fold from  $9.7 \times 10^6$  for 9.1 to  $1.6 \times 10^7$  CFU for 9.6, and for  
169 patient 13 CFU increased 7.8 fold from  $8.5 \times 10^6$  for 13.1 to  $6.6 \times 10^7$  for 13.4 from day 3 to day 7  
170 p.i, suggesting that these strains increased their virulence during infection. For patient 4, no  
171 difference was observed in the ability to survive inside macrophages ( $2.6 \times 10^6$  CFUs for 4.1 vs.  
172  $3.0 \times 10^6$  CFUs for 4.6). Taken together our results suggest that Mav dynamically adapts to the  
173 hostile environment of the host, thus facilitating persistence /chronic infection.



174 **Host-adaptation can change the inflammatory properties of Mav.** Inflammatory responses  
175 are central in controlling infection and we have previously shown that negative regulation of  
176 inflammatory responses by Keap1 or by depletion of Toll-like receptor (TLR)-signaling  
177 facilitates intracellular replication of Mav in human primary macrophages (28–30). We therefore  
178 performed a broad systematic screen on the early expression of inflammatory genes to identify  
179 changes in immune stimulatory properties that could explain the change in survival. Murine  
180 BMDMs were infected with the first and the last clinical isolates of patient 9 at a MOI of 10 for 6  
181 hours. Genes were identified and plotted that were differentially expressed (at least two-fold  
182 induced or repressed) in macrophages infected with the last compared to the first isolate (Fig.S3).  
183 The analysis revealed down-regulation of many pro-inflammatory cytokines and we decided to  
184 measure protein levels of two of them, IL-6 and IL-1 $\beta$ , from supernatants of BMDMs infected  
185 with all isolates from patient 4, 9 and 13 (Fig. 4a-b). IL-1 $\beta$  secretion was low and highly variable  
186 for all strains, whereas IL-6 secretion was more potently induced. As the gene expression data  
187 indicated, we observe that despite an increased bacterial load in the macrophages infected with  
188 the final isolates of patient 9 and 13, the IL-6 levels were lower than from supernatants of  
189 macrophages infected with the first isolates. These results are in line with previous studies (31),  
190 and the reduced inflammation may facilitate intracellular survival (Fig. 3). However, patient 4  
191 isolates did not show a similar reduction in cytokine production and confirmed the level of  
192 variation that has been previously reported (29).

193 **Host-adaptation can change the ability of Mav to survive in mice.** To validate if *in vitro*  
194 observations were reflected *in vivo*, we infected C57BL/6 mice with isolates from patient 9 (9.1,  
195 9.5, 9.6) and 13 (13.1, 13.2, 13.4) (Fig. 5). We chose to investigate isolates from patient 9 and 13,  
196 as the *in vitro* data strongly indicated that the last isolates from these patients showed increased

197 survival within the macrophages compared to the early isolates. At day 15, 30 and 70 of  
198 infection, we measured the number of bacteria from both spleen and liver of mice (Fig. 5a and b  
199 respectively). Overall, the bacterial loads were constant or slightly increasing over time for most  
200 isolates in both liver and spleen.

201 For patient 9, the only significant difference was seen in the liver at day 30 p.i , where there was  
202 an increase in CFU for the first isolate when compared to the last isolates (9.5, 9.6) ( $p < 0.05$ ).

203 This is incongruent with our observations in macrophage infections (Fig. 3b-c). However, the *in*  
204 *vivo* data suggests no overall difference in virulence between the three isolates from patient 9 (Fig.  
205 5a and 5b, left). For Patient 13, the *in vivo* condition reflected our observations of increased  
206 infectivity that we made in macrophages (Fig, 3b,c). Throughout infection, we found  
207 significantly increased bacterial loads in liver and spleen from mice infected with the last isolate,  
208 13.4, compared to 13.1 and 13.2 (Fig. 5a and b, right), suggesting a gain in virulence over time.

209 At day 70, spleen size increased substantially in mice infected with isolates 13.2 and 13.4  
210 compared to 13.1, and the color of the 13.4 spleens was strikingly pale when compared to the  
211 other spleens (Fig. 5c, upper row).

212 On further histological examination of spleens on day 70 p.i. (Fig. 5c, middle row), we  
213 observed that the structure of the 13.4 spleens was almost replaced by coalescing granulomas. In  
214 contrast, smaller amounts of single small or medium sized granulomas, in part coalescing for  
215 13.2 spleens, were present in 13.1 and 13.2 spleens on day 70 p.i. Myeloid precursor cells and  
216 megakaryocytes were found in all affected spleens, indicating extra medullary hematopoiesis. A  
217 similar pattern of granulomatous infiltration was seen in liver sections on day 70 p.i. (Fig. 5c,  
218 lower row), however the distinction between normal tissue and granulomas was less obvious than  
219 in the spleen. Infection with the 13.4 isolate resulted in replacement of much of the normal liver  
220 tissue with sheets of granulomas. The granulomas were sparse and mostly separated for 13.1, the

221 granulomas were moderate in number for 13.2 but starting to coalesce. It is important to note that  
222 though 13.1 showed impaired growth *in vitro*, *in vivo* it still managed to survive, albeit poorly  
223 when compared to 13.4. Taken together our data suggest that the Mav isolated from patient 13  
224 changed properties over the course of infection in the patient and increased its ability to survive.  
225 Finally we investigated cytokine levels in organ homogenates from infected mice. The decrease  
226 in level of IL-6 and IL-1 $\beta$  observed in macrophages could not be observed in liver homogenates  
227 where levels were steady over time and between isolates (Fig. S4).

228 **Splenic CD4+ and CD8+ effector cytokines decrease over time in mice infected by all Mav**  
229 **isolates from patient 9 and 13.** It has previously been demonstrated that Mav infections elicit a  
230 CD4+ Th1 immune response, which is associated with resisting the spread of the pathogen (32,  
231 33). In our study, we analyzed Mav-specific IFN $\gamma$  or TNF $\alpha$  (effector cytokine) production from  
232 CD4+ and CD8+ T cells that were isolated from spleens of infected mice (Fig. 6). We observed  
233 that the frequency of both Mav-specific CD4+ and CD8+ T cells were high on day 15 p.i. and  
234 rapidly decreased by day 30 for patient 9, and more gradually to day 70 p.i for patient 13. This  
235 decrease in Mav-specific T cells was observed with all tested Mav isolates, despite sustained or  
236 even increased tissue bacterial loads (Fig. 5), The frequency of cytokine-producing CD8+ T cells  
237 was lower (<5%) than CD4+ T cells (20-40%) and did not change much over the course of  
238 infection.

239

## 240 **DISCUSSION**

241 In the current study, we evaluated the mutations acquired by Mav during persistent infection in  
242 human patients and further tested the pathogenesis of these isolates in macrophages and mice.

243 Within macrophages, the Mav isolates from patients 9 and 13 exhibited higher bacterial load and

244 down-regulated inflammatory cytokines. However, the last isolates from patient 13, but not  
245 patient 9, showed increased survival in mice compared to the first isolate.

246 Most intra-patient isolates showed similar PFGE profiles, suggesting persistent infection  
247 with a single MAC strain. On WGS analysis, we found variable mutation rates in sequential  
248 intra-patient isolates. If we compare strains from different patients our findings are in congruence  
249 with previous studies, which have reported high genetic diversity between Mav isolates (34–36).  
250 The mutation rate observed for isolates within a patient, ranged between 2.4-12.3 SNP's per year,  
251 which is comparatively higher than the mutation rate of ~0.5 SNP reported for Mtb isolates from  
252 humans (27) and macaques (20, 37). These observations further indicates that the genome of Mav  
253 is more malleable than that of Mtb, and more prone to variation, maybe due to influence from  
254 host factors. In addition, we analyzed the patient isolates for SNPs in two ways, the first was to  
255 use the first isolate sequence from each patient as the founder strain and tabulate the SNPs  
256 present in the subsequent isolates (Table S2). For the second analysis, all isolates from patients  
257 were treated as independent cultures and compared it to the reference strain Mav 104 as an out  
258 group. For patients 4 and 13, in the second analysis, two sub clonal populations were uncovered  
259 (Table S3), which could either be due to a microevolution of a single founder strain or mixed/re-  
260 infection. The plausibility of the former is more likely than the later, as PFGE patterns are nearly  
261 identical and the WGS pattern of differences found within sequential isolates were identical to  
262 each other. The likelihood of being re-infected with such a genetically similar strain is low based  
263 on the previous finding, describing high degree of genetic diversity in environmental isolates  
264 (38). In case of patient 4 and 13, it can be speculated that the evolution of the isolates may be  
265 linear or divergent. For patient 9, the predominance of unique SNPs in individual isolates that  
266 were not propagated to other isolates over time (i.e. not fixed), argues against linear evolution,  
267 and instead supports heterogeneity of the population structure *in vivo*. Studies in Mtb have

268 examined the presence of sub-clones and intra-patient microevolution (39–42) and support the  
269 presence of divergent populations, which can be either generated due to antibiotics (40) or  
270 clinical severity (42). Thus, our analysis supports two hypotheses, linear and divergent  
271 microevolution.

272         Innate immune cells like macrophages are the first line of defense against mycobacterial  
273 infections. In Mav pathogenesis, like Mtb, macrophages are the primary host cell that initialize  
274 the containment of the bacterium (14, 28). We tested intracellular growth within murine  
275 macrophages and observed that though all isolates managed to survive within the macrophage,  
276 the last isolates collected from two patients (9 and 13) survived better than initial isolates from  
277 the same patient. This increased survival of certain isolates could either be due to their increased  
278 multiplication rate or impaired ability of the macrophages to eradicate the bug (5, 24, 43, 44). In  
279 our experiments, we measured reduced levels of pro-inflammatory cytokines like IL-6 and IL-1 $\beta$   
280 when macrophages were infected with later isolates compared to the initial isolate from a patient.  
281 The levels of IL-1 $\beta$  were highly variable in our experiments. Efficient IL-1 $\beta$  production requires  
282 that mycobacteria come in contact with the cytosol and since Mav is not present in the cytosol  
283 (30), this could explain the varying results. The ability to activate host defenses by Mav has  
284 previously been shown to vary between Mav isolates, and down-regulation of pro-inflammatory  
285 cytokines is believed to promote survival of the bacterium (12, 18, 45). The present study is the  
286 first to indicate that the ability to activate host-defenses can change over the course of an  
287 infection by Mav. To support our *in vitro* observations, mice were infected with isolates from two  
288 of the patients and infection showed the same trend as for the *in vitro* experiments for one set of  
289 isolates. It has been previously observed that there is a discordance between *in vitro* and *in vivo*  
290 data (5, 24). One explanation could be that *in vitro* macrophage infections represent an isolated

291 system, as opposed to mice, where other immune cells, including the adaptive arm of the immune  
292 system, play an active role in curtailing the infection.

293 Cytokines like IFN $\gamma$  and TNF $\alpha$ , produced by effector T cells, contribute to control of the  
294 infection at chronic stages (32). We previously demonstrated that, in mice infected with Mav 104,  
295 the induction of effector T cell responses coincided with a decrease in bacterial loads (33). In our  
296 current experiments, all the clinical isolates from both patients 9 and 13 impaired CD4<sup>+</sup> effector  
297 T cell responses from around day 30 p.i. and exhibited bacterial persistence over time. Although,  
298 *in vitro*, there was an inverse relationship between bacterial count and inflammatory response, *in*  
299 *vivo*, the increase in bacterial counts could not be explained by production of inflammatory  
300 cytokines. We speculate that there could be other cells or effector molecules that play a role and  
301 that have not been studied, such as B cells,  $\gamma/\delta$  T cells, neutrophils, natural killer cells and  
302 effector molecules like IL-10, IL-17 and TGF- $\beta$  which all have previously been reported to have  
303 an important role in host defenses towards mycobacteria (46–50). Furthermore, the increased  
304 virulence exhibited by the isolates could be due to the high bacterial load. Studies have illustrated  
305 that at chronic stages of infection, due to prolonged exposure to high doses of antigen, T cells  
306 may undergo terminal differentiation and in parallel undergo apoptosis (51, 52). Considering the  
307 results obtained, we speculate that a diverse milieu can lead to modifications in the immune-  
308 modulating properties and intracellular proliferation of intra-patient isolates over time. Looking  
309 at WGS data (Table S2 and S3) for isolates from patient 13, 13.4 exhibited a distinct increase in  
310 survival *in vivo* after the first time-point, in which a SNP in MAV0182 (K38T) was observed.  
311 MAV0182 is annotated as a super oxide dismutase (Fe-Mn) (SOD); SODs catalyze the  
312 dismutation of the superoxide radical to H<sub>2</sub>O<sub>2</sub> and oxygen. In *M. paratuberculosis* and Mtb, SOD  
313 is actively secreted and has shown to generate protective cellular immunity(53, 54). We speculate

314 a similar role for MAV0182 and the SNP may aid in survival of 13.4. In addition, in 13.2, which  
315 also exhibited increased growth, a SNP F267V in MAV2838 was observed. In fact, this was the  
316 only novel polymorphism observed in 13.2 compared to 13.1. MAV2838 is an orthologue of the  
317 *oxyR* transcription factor, which is known to function during oxidative response. (55, 56). It is  
318 conceivable that the mutation F267V in MAV2838 confers a growth advantage through an  
319 adaptive response to oxidative stress. Further evaluation of the phenotypic effects of these SNPs,  
320 such as recombineering, will be required to test their role in survival.

321 This is the first study analyzing in-patient evolution of Mav infection in humans. A  
322 possible limitation is that the cohort studied was small. In addition, only a single isolate was  
323 collected and analyzed at each time point. Multiple isolates from each time point would provide  
324 more statistical confidence to our findings and could give more evidence for evolution within the  
325 patient. In conclusion, we identified intra-patient genetic variation of Mav during persistent  
326 human infection, and observed surprisingly high mutation rates. In addition, the response of the  
327 immune system to these clinical isolates was tested in macrophages and mice, demonstrating a  
328 highly adaptive microbe within the individual patients over time. Further investigation of the  
329 correlation between SNPs and adaptation of Mav may provide insight into the multiple strategies  
330 which Mav employs to resist chemotherapy and thereby help to develop more effective treatment  
331 strategies.

332

## 333 **MATERIAL AND METHODS**

### 334 **Clinical isolates**

335 40 clinical isolates from 15 patients diagnosed with MAC infections (2 to 6 consecutive isolates  
336 for each patient) were obtained from the Department of Medical Microbiology at St. Olavs  
337 Hospital in Trondheim, Norway. All isolates were previously characterized as MAC by the

338 Norwegian Institute of Public Health in Oslo, Norway. The Regional Committee for Medical and  
339 Health Research Ethics approved this study (REK nord 2013/802).

340 The sixteen Mav isolates investigated in depth in the current study were collected in  
341 chronological order (2005-2007) from the sputum of patients. The isolates were grown on 7H10  
342 Middlebrook (Difco/Becton Dickinson) medium supplemented with 10% ADC (Difco/Becton  
343 Dickinson). Single colonies were transferred to 7H9 Middlebrook (Difco/Becton Dickinson)  
344 liquid medium supplemented with 10% ADC (Difco/Becton Dickinson). All cultures were grown  
345 to the logarithmic phase  $OD_{600nm}$  0.5-0.6; bacterial cultures were pelleted down and resuspended  
346 in PBS, followed by sonication, and finally passed through a syringe to obtain a single cell  
347 suspension. These suspensions were further used either in *in vitro* or *in vivo* infections.

#### 348 **Pulsed Field Gel Electrophoresis (PFGE)**

349 A modified protocol by Stevenson *et al.* (57) was employed. PFGE patterns were examined both  
350 visually and by computer-assisted analysis. Cluster analysis to compare SnaBI profiles and to  
351 construct dendrograms was performed using the Dice similarity coefficient and Unweighted Pair  
352 Group Method with Arithmetic Mean (UPGMA) in BioNumerics version 6.6 (Applied Maths,  
353 Sint-Martens-Latem, Belgium). General guidelines for interpreting chromosomal DNA restriction  
354 patterns were used in evaluating the relatedness of clinical isolates (58).

#### 355 **Genome Sequencing and Assembly**

356 DNA was extracted by the CTAB-lysozyme method (59). Samples were sequenced on an  
357 Illumina HiSeq 2500 with a read length of 106 bp or an Illumina HiSeq 4000 with a read length  
358 of 150 bp, both in paired-end mode. The mean depth of coverage was 109.0x (range 51-158).  
359 Genome sequences were assembled by a comparative-assembly method (60). Reads were  
360 mapped to Mav 104 (NC\_008595.1) as a reference genome using BWA (61). Then, regions with



361 indels or clusters of single nucleotide polymorphisms (SNPs) were identified and repaired by  
362 building local contigs from overlapping reads spanning such regions.

### 363 **Macrophages culture and infection**

364 Bone marrow derived macrophages (BMDMs) were generated by culturing bone-marrow cells of  
365 C57BL/6 mice in RPMI-1640 medium (Sigma)/10% fetal calf serum (Gibco) and 20% L929 cell  
366 line supernatant for 4 days. Macrophages were seeded at 50,000 cells/ well in a 96 well plate and  
367 infected with Mav clinical isolates at a MOI of 10 for two hours. Cells were washed with Hanks  
368 balanced salt solution to eliminate extracellular bacteria. Three wells were lysed with PBS  
369 containing 0.02% Triton X (Sigma) and plated in serial dilutions on 7H10 Middlebrook plates in  
370 triplicate to enumerate uptake by CFU counting (t =0). At day 1, 3 and 7, infected cells were  
371 lysed and serial dilutions plated on 7H10 Middlebrook plates in triplicate, to record the course of  
372 infection.

### 373 **Cytokine quantification from infected macrophages**

374 Macrophages were seeded at 200,000 cells/well in a 24 well plate and infected with Mav clinical  
375 isolates at a MOI of 10 for two hours before cells were washed to eliminate extracellular bacteria.  
376 Supernatants were harvested at 2h, 6h, 1, 3 and 7 days. IL-6 and IL-1 $\beta$  ELISAs (both from R&D  
377 systems) were performed on the supernatants according to the manufacturer's protocol.

### 378 **Mouse infection experiments**

379 All protocols on animal work were approved by the Norwegian National Animal Research  
380 Authorities and carried out in accordance with Norwegian and European regulations and  
381 guidelines. C57BL/6 mice were bred in house and used at 6-8 weeks of age for experiments.  
382 Infection was performed by intraperitoneal injection of log-phase mycobacteria ( $2 \times 10^7$  -  $1 \times 10^9$   
383 CFU/mouse) in 0.2 ml PBS; inoculum was measured by CFU plating. At given time-points after

384 infection, mice were killed, and spleen and liver were collected. Bacterial load was measured by  
385 plating serial dilutions of organ homogenates (spleen, liver) on 7H10 Middlebrook plates.

### 386 **Mav-specific T cell cytokine production**

387 Splenocytes were isolated and prepared for flow cytometry as described in (33). Splenocytes  
388 were stimulated overnight with clinical Mav isolates from patient 9 and 13 at a MOI of 1.  
389 Concanavallin A (Sigma, 2.5 $\mu$ g/ml) stimulation was used as positive control, unstimulated cells  
390 served as negative control. Protein transport inhibitor (eBioscience) was added during the last 4h  
391 of stimulation. Surface antigen were stained with monoclonal antibodies against CD3 (FITC),  
392 CD4 (Brilliant Violet 605) and CD8 (Brilliant Violet 785, all from Biolegend). After fixation (2%  
393 PFA, Sigma) and permeabilization (0.5 %, Sigma), intracellular cytokine staining was performed  
394 for IFN $\gamma$  (PE) and TNF $\alpha$  (APC, both from Biolegend). Flow-cytometry was performed on a BD  
395 LSR II flow-cytometer (BD Biosciences) and data analyzed using FlowJo (FlowJo, LLC) and  
396 GraphPad Prism (GraphPad Software, Inc.) software.

### 397 **Histopathology**

398 Organ samples were fixed in buffered formalin, processed through standard dehydration, clearing  
399 and placed in paraffin overnight, cut in 5  $\mu$ m thick sections and stained with hematoxylin &  
400 eosin. Microscopic images were taken with a Lumenera Infinity 2 camera and INFINITY  
401 ANALYZE software, release 6.2 (Lumenera Corp.) using a Nikon eclipse Ci microscope (Nikon)  
402 with 40x magnification.

### 403 **Statistics**

404 All values from intracellular replication experiments are means of four independent experiments,  
405 performed in duplicate or triplicate. Results are presented as mean  $\pm$  SEM and analyzed by two-  
406 way ANOVA followed by a Turkey post-test. Values obtained in mice experiments show mean $\pm$   
407 SEM of two independent experiments, with four mice in each group. Results were analyzed by

408 two-way ANOVA, followed by Bonferroni post-test. In all analyses, a p-value of <0.05 was  
409 considered as statistically significant. Data analysis and statistical tests were performed with  
410 Graph Pad Prism 5.0 (GraphPad Software, Inc.).

411

## 412 **ACKNOWLEDGEMENTS**

413 This work was partly supported by the Research Council of Norway through its Centres of  
414 Excellence funding scheme, project number 223255/F50. In addition the Research Council of  
415 Norway supported the work through project numbers 220836/F10 and 246944/F10. In addition  
416 NTNU and the Liaison Committee between the Central Norway Regional Health Authority  
417 (RHA) and the Norwegian University of Science and Technology (NTNU) contributed with  
418 funding to the study.

419

420

421 **REFERENCES**

- 422 1. Inderlied CB, Kemper CA, Bermudez LE. 1993. The Mycobacterium avium complex. Clin  
423 Microbiol Rev 6:266–310.
- 424 2. Falkinham JO. 2009. Surrounded by mycobacteria: Nontuberculous mycobacteria in the  
425 human environment. J Appl Microbiol 107:356–367.
- 426 3. Faria S, Joao I, Jordao L. 2015. General Overview on Nontuberculous Mycobacteria,  
427 Biofilms, and Human Infection. J Pathog 2015:1–10.
- 428 4. Horsburgh CR, Gettings J, Alexander LN, Lennox JL. 2001. Disseminated Mycobacterium  
429 avium Complex Disease among Patients Infected with Human Immunodeficiency Virus ,  
430 1985 – 2000 2118:3–8.
- 431 5. Tateishi Y, Hirayama Y, Ozeki Y, Nishiuchi Y, Yoshimura M, Kang J, Shibata A, Hirata  
432 K, Kitada S, Maekura R, Ogura H, Kobayashi K, Matsumoto S. 2009. Virulence of  
433 Mycobacterium avium complex strains isolated from immunocompetent patients. Microb  
434 Pathog 46:6–12.
- 435 6. Field SK, Fisher D, Cowie RL. 2004. Mycobacterium avium complex Pulmonary Disease  
436 in Patients Without HIV Infection. Chest 126:566–581.
- 437 7. Bruijnesteijn Van Coppenraet LES, De Haas PEW, Lindeboom JA, Kuijper EJ, Van  
438 Soolingen D. 2008. Lymphadenitis in children is caused by Mycobacterium avium  
439 hominissuis and not related to “bird tuberculosis.” Eur J Clin Microbiol Infect Dis 27:293–  
440 299.
- 441 8. Griffith DE, Aksamit T, Brown-Elliott BA, Catanzaro A, Daley C, Gordin F, Holland SM,  
442 Horsburgh R, Huitt G, Iademarco MF, Iseman M, Olivier K, Ruoss S, Von Reyn CF,

- 443 Wallace RJ, Winthrop K. 2007. An official ATS/IDSA statement: Diagnosis, treatment,  
444 and prevention of nontuberculous mycobacterial diseases. *Am J Respir Crit Care Med*  
445 175:367–416.
- 446 9. Ryu YJ, Koh WJ, Daley CL. 2016. Diagnosis and treatment of nontuberculous  
447 mycobacterial lung disease: Clinicians’ perspectives. *Tuberc Respir Dis (Seoul)* 79:74–84.
- 448 10. Brode SK, Daley CL, Marras TK. 2014. The epidemiologic relationship between  
449 tuberculosis and non-tuberculous mycobacterial disease: a systematic review. *Int J Tuberc*  
450 *Lung Dis* 18:1370–1377.
- 451 11. Cooper AM, Mayer-Barber KD, Sher A. 2011. Role of innate cytokines in mycobacterial  
452 infection. *Mucosal Immunol* 4:252–260.
- 453 12. Furney SK, Skinner PS, Roberts AD, Appelberg R, Orme IM. 1992. Capacity of  
454 *Mycobacterium avium* isolates to grow well or poorly in murine macrophages resides in  
455 their ability to induce secretion of tumor necrosis factor. *Infect Immun*.
- 456 13. Appelberg R, Castro a. G, Pedrosa J, Silva R a., Orme IM, Minoprio P. 1995. Erratum:  
457 Role of gamma interferon and tumor necrosis factor alpha during T-cell-independent and -  
458 dependent phases of *Mycobacterium avium* infection (*Infection and Immunity* 62:9  
459 (3969)). *Infect Immun* 63:1145.
- 460 14. Awuh JA, Flo TH. 2017. Molecular basis of mycobacterial survival in macrophages. *Cell*  
461 *Mol Life Sci* 74:1625–1648.
- 462 15. Mayer-Barber KD, Sher A. 2015. Cytokine and lipid mediator networks in tuberculosis.  
463 *Immunol Rev* 264:264–275.
- 464 16. Appelberg R. 1994. Protective Role of Interferon Gamma, Tumor Necrosis Factor Alpha

- 465 and Interleukin-6 in *Mycobacterium tuberculosis* and *M. avium* Infections.  
466 *Immunobiology* 191:520–525.
- 467 17. VanHeyningen TK, Collins HL, Russell DG. 1997. IL-6 Produced by Macrophages  
468 Infected with *Mycobacterium* species Suppresses T Cell Responses. *J Immunol* 158:330–  
469 337.
- 470 18. Fattorini L, Xiao Y, Li B, Santoro C, Ippoliti F, Orefici G. 1994. Induction of IL-1??, IL-6,  
471 TNF-??, GM-CSF and G-CSF in human macrophages by smooth transparent and smooth  
472 opaque colonial variants of *Mycobacterium avium*. *J Med Microbiol* 40:129–133.
- 473 19. Ernst JD, Trevejo-nuñez G, Banaiee N. 2007. Science in medicine Genomics and the  
474 evolution , pathogenesis , and diagnosis of tuberculosis. *J Clin Invest* 117:1738–1745.
- 475 20. Ford CB, Lin PL, Chase MR, Shah RR, Iartchouk O, Galagan J, Mohaideen N, Ioerger  
476 TR, Sacchettini JC, Lipsitch M, Flynn JL, Fortune SM. 2011. Use of whole genome  
477 sequencing to estimate the mutation rate of *Mycobacterium tuberculosis* during latent  
478 infection. *Nat Genet* 43:482–486.
- 479 21. Uchiya K, Tomida S, Nakagawa T, Asahi S, Nikai T, Ogawa K. 2017. Comparative  
480 genome analyses of *Mycobacterium avium* reveal genomic features of its subspecies and  
481 strains that cause progression of pulmonary disease. *Sci Rep* 7:39750.
- 482 22. Semret M, Zhai G, Mostowy S, Cleto C, Alexander D, Cangelosi G, Cousins D, Collins  
483 DM, Van Soolingen D, Behr MA. 2004. Extensive Genomic Polymorphism within  
484 *Mycobacterium avium*. *J Bacteriol* 186:6332–6334.
- 485 23. Oliveira RS, Sircili MP, Oliveira EMD, Balian SC, Ferreira-Neto JS, Leão SC. 2003.  
486 Identification of *Mycobacterium avium* Genotypes with Distinctive Traits by Combination

- 487 of IS1245-Based Restriction Fragment Length Polymorphism and Restriction Analysis of  
488 hsp65. J Clin Microbiol 41:44–49.
- 489 24. Pedrosa J, Flórido M, Kunze ZM, Castro a G, Portaels F, McFadden J, Silva MT,  
490 Appelberg R. 1994. Characterization of the virulence of Mycobacterium avium complex  
491 (MAC) isolates in mice. Clin Exp Immunol 98:210–6.
- 492 25. Amaral EP, Kipnis TL, de Carvalho ECQ, da Silva WD, Leão SC, Lasunskaja EB. 2011.  
493 Difference in virulence of mycobacterium avium isolates sharing indistinguishable dna  
494 fingerprint determined in murine model of lung infection. PLoS One 6.
- 495 26. Zhao X, Epperson LE HN, Honda JR, Chan ED, Strong M WN, RM. D. 2017. Complete  
496 Genome Sequence of Mycobacterium aviumsubsp.hominissuis Strain H87 Isolated from  
497 an Indoor Water Sample. Genome Announc 5:16–17.
- 498 27. Walker TM, Ip CLC, Harrell RH, Evans JT, Kapatai G, Dediccoat MJ, Eyre DW, Wilson  
499 DJ, Hawkey PM, Crook DW, Parkhill J, Harris D, Walker a. S, Bowden R, Monk P,  
500 Smith EG, Peto TE a. 2013. Whole-genome sequencing to delineate Mycobacterium  
501 tuberculosis outbreaks: A retrospective observational study. Lancet Infect Dis 13:137–146.
- 502 28. Appelberg R. 2006. Pathogenesis of Mycobacterium avium infection: typical responses to  
503 an atypical mycobacterium? Immunol Res 35:179–190.
- 504 29. Awuh JA, Haug M, Mildenerger J, Marstad A, Do CPN, Louet C, Stenvik J, Steigedal M,  
505 Damås JK, Halaas Ø, Flo TH. 2015. Keap1 regulates inflammatory signaling in  
506 Mycobacterium avium -infected human macrophages. Proc Natl Acad Sci 112:E4272–  
507 E4280.
- 508 30. Gidon A, Åsberg SE, Louet C, Ryan L, Haug M, Flo TH. 2017. Persistent mycobacteria

- 509 evade an antibacterial program mediated by phagolysosomal TLR7/8/MyD88 in human  
510 primary macrophages. *PLoS Pathog* 13:1–27.
- 511 31. Blumenthal A, Lauber J, Hoffmann R, Ernst M, Keller C, Buer J, Ehlers S, Reiling N.  
512 2005. Common and unique gene expression signatures of human macrophages in response  
513 to four strains of *Mycobacterium avium* that differ in their growth and persistence  
514 characteristics. *Infect Immun*.
- 515 32. Doherty TM, Sher a. 1997. Defects in cell-mediated immunity affect chronic, but not  
516 innate, resistance of mice to *Mycobacterium avium* infection. *J Immunol* 158:4822–4831.
- 517 33. Haug M, Awuh J a., Steigedal M, Frengen Kojen J, Marstad A, Nordrum IS, Halaas Ø, Flo  
518 TH. 2013. Dynamics of immune effector mechanisms during infection with  
519 *mycobacterium avium* in C57BL/6 mice. *Immunology* 140:232–243.
- 520 34. Ichikawa K, Yagi T, Moriyama M, Inagaki T, Nakagawa T, Uchiya KI, Nikai T, Ogawa K.  
521 2009. Characterization of *Mycobacterium avium* clinical isolates in Japan using  
522 subspecies-specific insertion sequences, and identification of a new insertion sequence,  
523 ISMav6. *J Med Microbiol* 58:945–950.
- 524 35. Ichikawa K, van Ingen J, Koh WJ, Wagner D, Salfinger M, Inagaki T, Uchiya K ichi,  
525 Nakagawa T, Ogawa K, Yamada K, Yagi T. 2015. Genetic diversity of clinical  
526 *Mycobacterium avium* subsp. *hominissuis* and *Mycobacterium intracellulare* isolates  
527 causing pulmonary diseases recovered from different geographical regions. *Infect Genet*  
528 *Evol* 36:250–255.
- 529 36. Uchiya K ichi, Takahashi H, Yagi T, Moriyama M, Inagaki T, Ichikawa K, Nakagawa T,  
530 Nikai T, Ogawa K. 2013. Comparative Genome Analysis of *Mycobacterium avium*



- 531 Revealed Genetic Diversity in Strains that Cause Pulmonary and Disseminated Disease.  
532 PLoS One 8.
- 533 37. Ford CB, Shah RR, Maeda MK, Gagneux S, Murray MB, Cohen T, Johnston JC, Gardy J,  
534 Lipsitch M, Fortune SM. 2013. Mycobacterium tuberculosis mutation rate estimates from  
535 different lineages predict substantial differences in the emergence of drug-resistant  
536 tuberculosis. *Nat Genet* 45:784–790.
- 537 38. Iwamoto T, Nakajima C, Nishiuchi Y, Kato T, Yoshida S, Nakanishi N, Tamaru A,  
538 Tamura Y, Suzuki Y, Nasu M. 2012. Infection , Genetics and Evolution Genetic diversity  
539 of Mycobacterium avium subsp . hominissuis strains isolated from humans , pigs , and  
540 human living environment. *Infect Genet Evol* 12:846–852.
- 541 39. Pérez-Lago L, Comas I, Navarro Y, González-Candelas F, Herranz M, Bouza E, García-  
542 De-Viedma D. 2014. Whole Genome Sequencing Analysis of Inpatient Microevolution  
543 in Mycobacterium tuberculosis: Potential Impact on the Inference of Tuberculosis  
544 Transmission. *J Infect Dis*.
- 545 40. Liu Q, Via LE, Luo T, Liang L, Liu X, Wu S, Shen Q, Wei W, Ruan X, Yuan X, Zhang G,  
546 Barry Iii CE, Gao Q. 2015. Within patient microevolution of Mycobacterium tuberculosis  
547 correlates with heterogeneous responses to treatment. *Nat Publ Gr*.
- 548 41. Eldholm V, Norheim G, von der Lippe B, Kinander W, Dahle UR, Caugant DA,  
549 Mannsåker T, Mengshoel AT, Dyrhol-Riise AM, Balloux F. 2014. Evolution of  
550 extensively drug-resistant Mycobacterium tuberculosis from a susceptible ancestor in a  
551 single patient. *Genome Biol* 15:490.
- 552 42. O’Neill MB, Mortimer TD, Pepperell CS. 2015. Diversity of Mycobacterium tuberculosis

- 553 across Evolutionary Scales. *PLoS Pathog* 11:1–29.
- 554 43. Crowle AJ, Tsang AY, Vatter AE, May MH. 1986. Comparison of 15 laboratory and  
555 patient-derived strains of *Mycobacterium avium* for ability to infect and multiply in  
556 cultured human macrophages. *J Clin Microbiol*.
- 557 44. Birkness KA, Swords WE, Huang PH, White EH, Dezzutti CS, Lal RB, Quinn FD. 1999.  
558 Observed differences in virulence-associated phenotypes between a human clinical isolate  
559 and a veterinary isolate of *Mycobacterium avium*. *Infect Immun* 67:4895–4901.
- 560 45. Tse HM, Josephy SI, Chan ED, Fouts D, Cooper AM. 2002. Activation of the mitogen-  
561 activated protein kinase signaling pathway is instrumental in determining the ability of  
562 *Mycobacterium avium* to grow in murine macrophages. *J Immunol* 168:825–833.
- 563 46. Petrofsky M, Bermudez LE. 1999. Neutrophils from *Mycobacterium avium*-Infected Mice  
564 Produce TNF- $\alpha$ , IL-12, and IL-1 $\beta$  and Have a Putative Role in Early Host Response. *Clin*  
565 *Immunol* 91:354–358.
- 566 47. Roque S, Nobrega C, Appelberg R, Correia-Neves M. 2007. IL-10 underlies distinct  
567 susceptibility of BALB/c and C57BL/6 mice to *Mycobacterium avium* infection and  
568 influences efficacy of antibiotic therapy. *J Immunol* 178:8028–8035.
- 569 48. Flórido M, Correia-Neves M, Cooper AM, Appelberg R. 2003. The cytolytic activity of  
570 natural killer cells is not involved in the restriction of *Mycobacterium avium* growth. *Int*  
571 *Immunol* 15:895–901.
- 572 49. Pellegrin JL, Taupin JL, Dupon M, Ragnaud JM, Maugein J, Bonneville M, Moreau JF.  
573 1999. Gammadelta T cells increase with *Mycobacterium avium* complex infection but not  
574 with tuberculosis in AIDS patients. *Int Immunol* 11:1475–1478.

- 575 50. Lockhart E, Green AM, Flynn JL. 2006. IL-17 production is dominated by gammadelta T  
576 cells rather than CD4 T cells during *Mycobacterium tuberculosis* infection. *J Immunol*  
577 177:4662–9.
- 578 51. Gilbertson B, Zhong J, Cheers C. 1999. Anergy, IFN-gamma production, and apoptosis in  
579 terminal infection of mice with *Mycobacterium avium*. *J Immunol* 163:2073–80.
- 580 52. Zhong J, Gilbertson B, Cheers C. 2003. Apoptosis of CD4+ and CD8+ T cells during  
581 experimental infection with *Mycobacterium avium* is controlled by Fas/FasL and Bcl-2-  
582 sensitive pathways, respectively. *Immunol Cell Biol* 81:480–486.
- 583 53. Horwitz MA, Lee BW, Dillon BJ, Harth G. 1995. Protective immunity against tuberculosis  
584 induced by vaccination with major extracellular proteins of *Mycobacterium tuberculosis*.  
585 *Proc Natl Acad Sci* 92:1530–1534.
- 586 54. Liu X, Feng Z, Harris NB, Cirillo JD, Bercovier H, Barletta RG. 2001. Identification of a  
587 secreted superoxide dismutase in *Mycobacterium avium* ssp. *paratuberculosis*. *FEMS*  
588 *Microbiol Lett* 202:233–238.
- 589 55. Sherman DR, Sabo PJ, Hickey MJ, Arain TM, Mahairas GG, Yuan Y, Barry, 3rd CE,  
590 Stover CK. 1995. Disparate responses to oxidative stress in saprophytic and pathogenic  
591 mycobacteria. *Proc Natl Acad Sci U S A* 92:6625–6629.
- 592 56. Geier H, Mostowy S, Cangelosi GA, Behr MA, Ford TE. 2008. Autoinducer-2 triggers the  
593 oxidative stress response in *Mycobacterium avium*, leading to biofilm formation. *Appl*  
594 *Environ Microbiol* 74:1798–1804.
- 595 57. Stevenson K, Hughes VM, Juan L De, Inglis NF, Wright F, Sharp JM. 2002. Molecular  
596 Characterization of Pigmented and Nonpigmented Isolates of *Mycobacterium avium* subsp

- 597 . paratuberculosis. *Society* 40:1798–1804.
- 598 58. Tenover FC, Arbeit RD, Goering R V., Mickelsen PA, Murray BE, Persing DH,  
599 Swaminathan B. 1995. Interpreting chromosomal DNA restriction patterns produced by  
600 pulsed- field gel electrophoresis: Criteria for bacterial strain typing. *J Clin Microbiol*  
601 33:2233–2239.
- 602 59. Larsen MH, Biermann K, Tandberg S, Hsu T, Jacobs WR. 2007. Genetic Manipulation of  
603 *Mycobacterium tuberculosis*. *Curr Protoc Microbiol*.
- 604 60. Ioerger TR, Feng Y, Ganesula K, Chen X, Dobos KM, Fortune S, Jacobs WR, Mizrahi V,  
605 Parish T, Rubin E, Sasseti C, Sacchettini JC. 2010. Variation among genome sequences of  
606 H37Rv strains of *Mycobacterium tuberculosis* from multiple laboratories. *J Bacteriol*  
607 192:3645–3653.
- 608 61. Li H, Durbin R. 2009. Fast and accurate short read alignment with Burrows-Wheeler  
609 transform. *Bioinformatics* 25:1754–1760.

610

611

612

613

614 **Figure Legends**

615 **FIG 1** Genetic comparison / classification of clinical MAC isolates from patients. (A) Pulse field  
616 gel electrophoresis of 40 clinical isolates from 15 patients was performed using a SnaBI typing  
617 method. Restriction enzymatic digestion by SnaBI created distinct profiles that could be used to  
618 distinguish between isolates from different patients and between isolates taken at different time  
619 points from the same patient. Dendrograms were generated based on cluster analysis using the  
620 UPGMA method and Dice similarity coefficient, to assist in visualizing SnaBI pattern similarity.  
621 (B) Maximum parsimony tree showing the phylogenetic relationship among the clinical isolates  
622 and two Mav reference strains, 104 and H87. The branch lengths indicate the number of changes  
623 (SNPs).

624  
625 **FIG 2** SNPs from whole-genome sequencing of Mav clinical isolates sampled over time from  
626 single patients. (A) The maximum-likelihood estimate of the rate parameter for clinical isolates  
627 from patients 4, 9 and 13 was calculated, assuming a Poisson model for the accumulation of  
628 SNPs over time, and represented as a mutation rate plot using Matlab. (B) Diagrammatic  
629 representation of the time-line of sample collection from patients 4, 9 and 13 and corresponding  
630 SNP development. Number of SNPs in green represents fixed mutations, whereas numbers in red  
631 are unique to that particular isolate and are lost in the subsequent isolates.

632  
633 **FIG 3** Growth in broth and intracellular replication in macrophages of sequential Mav isolates  
634 (A) Growth curves were recorded of sequential Mav isolates from patients 4, 9 and 13 grown for  
635 a period of 24 days. Isolates are numbered chronologically from the time they were collected  
636 from the patients. Recordings were performed in triplicates; the OD values show mean  $\pm$  SEM.  
637 (B) Intracellular replication in murine BMDMs infected with isolates from patients 4, 9 and 13 at

638 a MOI of 10. CFU counts from lysed macrophages were determined 1, 3 and 7 days after  
639 infection. (C) Intracellular bacterial counts represented as fold change normalized to the uptake  
640 of bacteria, at 2 hours post exposure /infection. Bars represent mean  $\pm$  SEM from 4 independent  
641 experiments; \*  $p < 0.05$ , \*\* $p < 0.01$  by Repeated measures Two-way ANOVA, Tukey post-test.

642

643 **FIG 4** Down-regulation of pro-inflammatory cytokines in Mav infected mouse macrophages.

644 Murine BMMs were infected with the sequential Mav isolates from patient 4, 9 and 13 at a MOI  
645 of 10. Levels of IL-6 (A) and IL-1 $\beta$  (B) were measured from supernatants at 2 h, 1 day, 3 days  
646 and 7 days post infection (p.i). Bars represent mean  $\pm$  SEM from three or four independent  
647 experiments; \* $p < 0.05$ , \*\* $p < 0.001$ , \*\*\* $p < 0.0001$  by Repeated measures Two-way ANOVA,  
648 Tukey post-test.

649

650 **FIG 5** Mycobacterial load and tissue pathology in mice infected with sequential Mav clinical

651 isolates. (A-B) C57BL/6 mice were infected intraperitoneally with Mav isolates from patient 9  
652 (9.1, 9.5, 9.6) and patient 13 (13.1, 13.2, 13.4) for 15, 30 and 70 days. Tissue bacterial loads in  
653 spleen and liver are shown as mean CFUs per gram  $\pm$  SEM from two experiments with four mice  
654 in each group. \* $p < 0.05$ , \*\* $p < 0.01$ , \*\*\* $p < 0.001$  by Repeated Measures Two-way ANOVA and  
655 Bonferroni's post-test. (C) Histological examination of spleen and liver from mice infected with  
656 Mav isolates 13.1, 13.2 and 13.4 at day 70 post infection. Upper and middle Panel: spleens and  
657 spleen tissue histology sections. RP indicates the red pulp and WP the white pulp areas. Lower  
658 Panel: liver histology. Arrows point to granulomatous structures. Images are taken at 40x  
659 magnification. Experiments done twice with similar results, one representative experiment is  
660 shown.

661

662 **FIG. 6** Mav-specific splenic T cell responses. C57BL/6 mice were infected with isolates of  
663 patient 9 (9.1, 9.5, and 9.6, left) and patient 13 (13.1, 13.2, and 13.4, right) for 15, 30 and 70  
664 days. Mav-specific T cell responses were measured from *in vitro* Mav re-stimulation of  
665 splenocytes 15, 30 and 70 days post infection (p.i). IFN $\gamma$  and TNF $\alpha$  production from CD4+ and  
666 CD8+ T cells were analyzed by intracellular flow-cytometry. A) Gating strategy. B) Results are  
667 represented as percentage of T cells producing the indicated cytokine. Results show mean  $\pm$  SEM  
668 of two experiments with four mice analyzed in each group.

669

### 670 **Supplementary Figure Legends**

671 **FIG S1** Differential melting curves from 16S rRNA gene qRT-PCR. The curves of 19 clinical  
672 MAC isolates as well as positive (*M. intracellulare* and Mtb) and negative controls are shown.

673

674 **FIG S2** Bone marrow derived murine macrophages were infected with clinical stains, collected  
675 in chronological order, at a MOI of 10. After two hours of infection, cells were washed and lysed  
676 to analyze uptake. Uptake is represented as log CFU and designated as zero hour.

677

678 **FIG S3** Nanostring data. Murine BMDMs were infected with the first and last clinical isolate of  
679 Mav (9.1 and 9.6) at a MOI of 10. After 6 hours post infection, cells were lysed in RLT buffer  
680 and subsequently RNA was extracted to perform nanostring analysis. nCounter<sup>®</sup> GX Mouse  
681 Inflammation Kit was used and the results were analyzed on Partek<sup>®</sup> Genomics Suite<sup>®</sup> software.

682

683 **FIG S4** Proinflammatory cytokines IL-6 (A) and IL-1 $\beta$  (B) measured from liver homogenates.  
684 Results are presented as ng cytokine per gram tissue.

685 **FIG S5** Accumulated number of SNPs, accounting for sub clones. SNPs were counted relative to  
686 Mav 104 for patients 9 and 13. The isolates from patient 13 were treated as two separate lineages  
687 (13.1-2 and 13.3-4). For patient 4, SNPs in isolates 4.2-4.6 were counted relative to 4.2.

688

689 **Table S1** Medical history and time line of sample collection for all the patients in the study.

690

691 **Table S2** List of genes containing SNPs. Both synonymous and non-synonymous mutations were  
692 observed. Putative gene function mentioned for non-synonymous mutations. Mav 104 reference  
693 from KEGG database was used to annotate function.

694

695 **Table S3** List of genes containing mutations (relative to Mav104, as an outgroup). Both,  
696 synonymous and non-synonymous mutations were observed. Putative gene function mentioned  
697 for non-synonymous mutations. Mav 104 reference from KEGG database was used to annotate  
698 function. The mutations for patient 13 are highlighted in red and blue to emphasize the two sub-  
699 series of isolates, (13.1, and 13.2) and (13.3, and 13.4). The mutations for patient 4 are  
700 highlighted in red and blue to emphasize the two sub-series of isolates (4.1) and (4.2-4.6)



**A****B**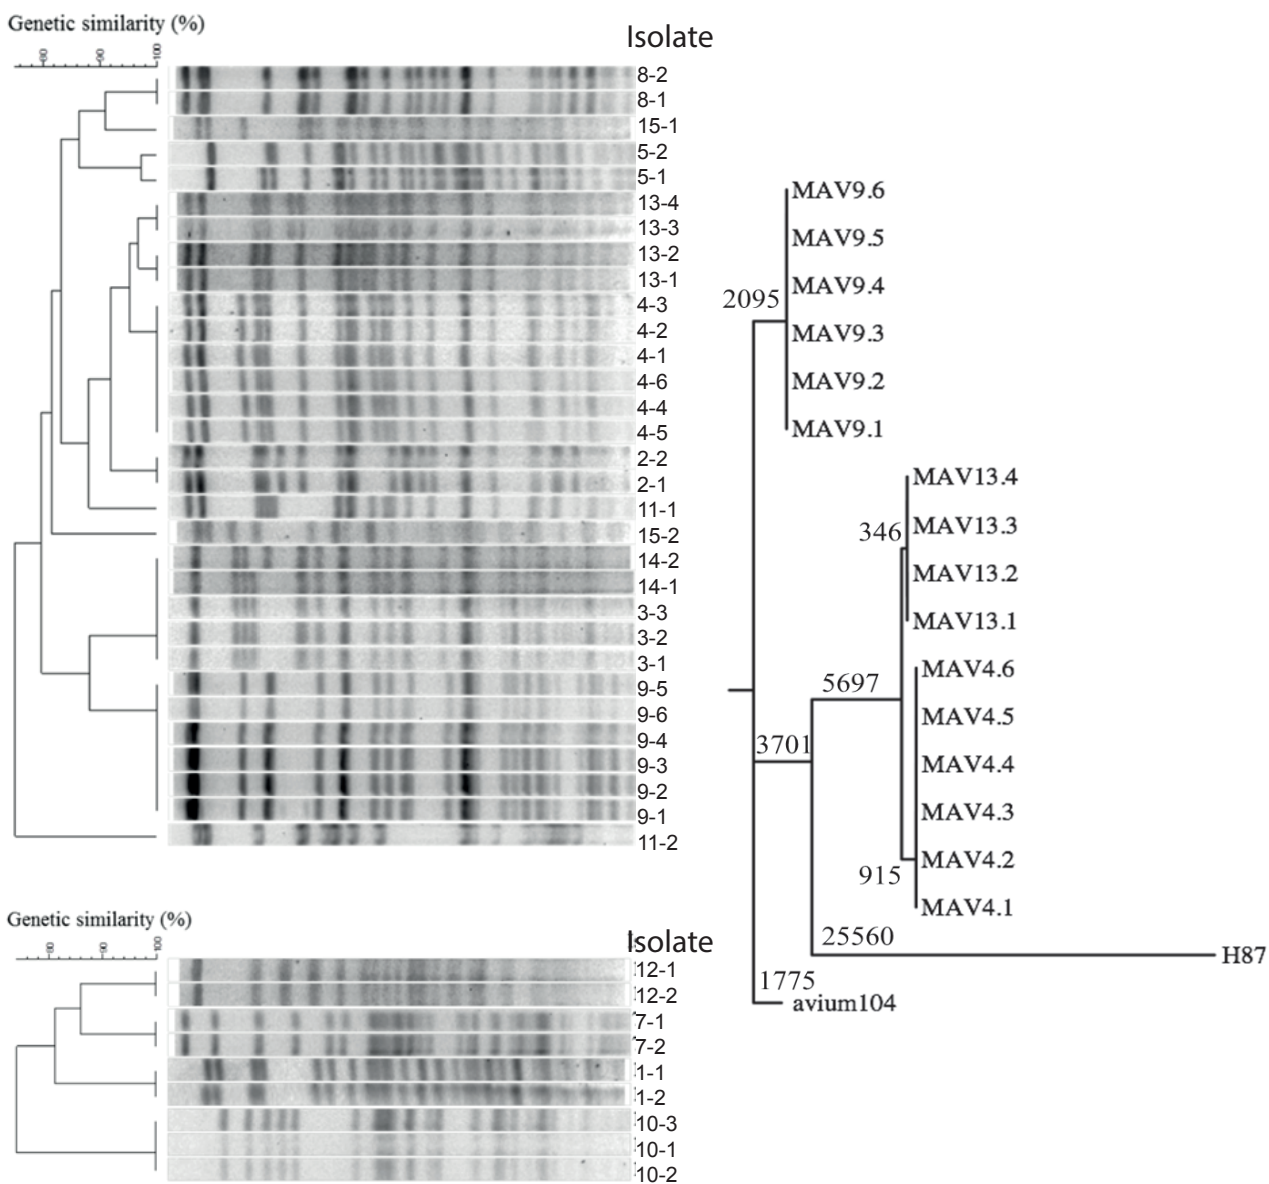

**FIG. 1** Genetic comparison / classification of clinical MAC isolates from patients. (A) Pulse field gel electrophoresis of 40 clinical isolates from 15 patients was performed using a *Sna*BI typing method. Restriction enzymatic digestion by *Sna*BI created distinct profiles that could be used to distinguish between isolates from different patients and between isolates taken at different time points from the same patient. Dendrograms were generated based on cluster analysis using the UPGMA method and Dice similarity coefficient, to assist in visualizing *Sna*BI pattern similarity. (B) Maximum parsimony tree showing the phylogenetic relationship among the clinical isolates and two *Mav* reference strains, 104 and H87. The branch lengths indicate the number of changes (SNPs).

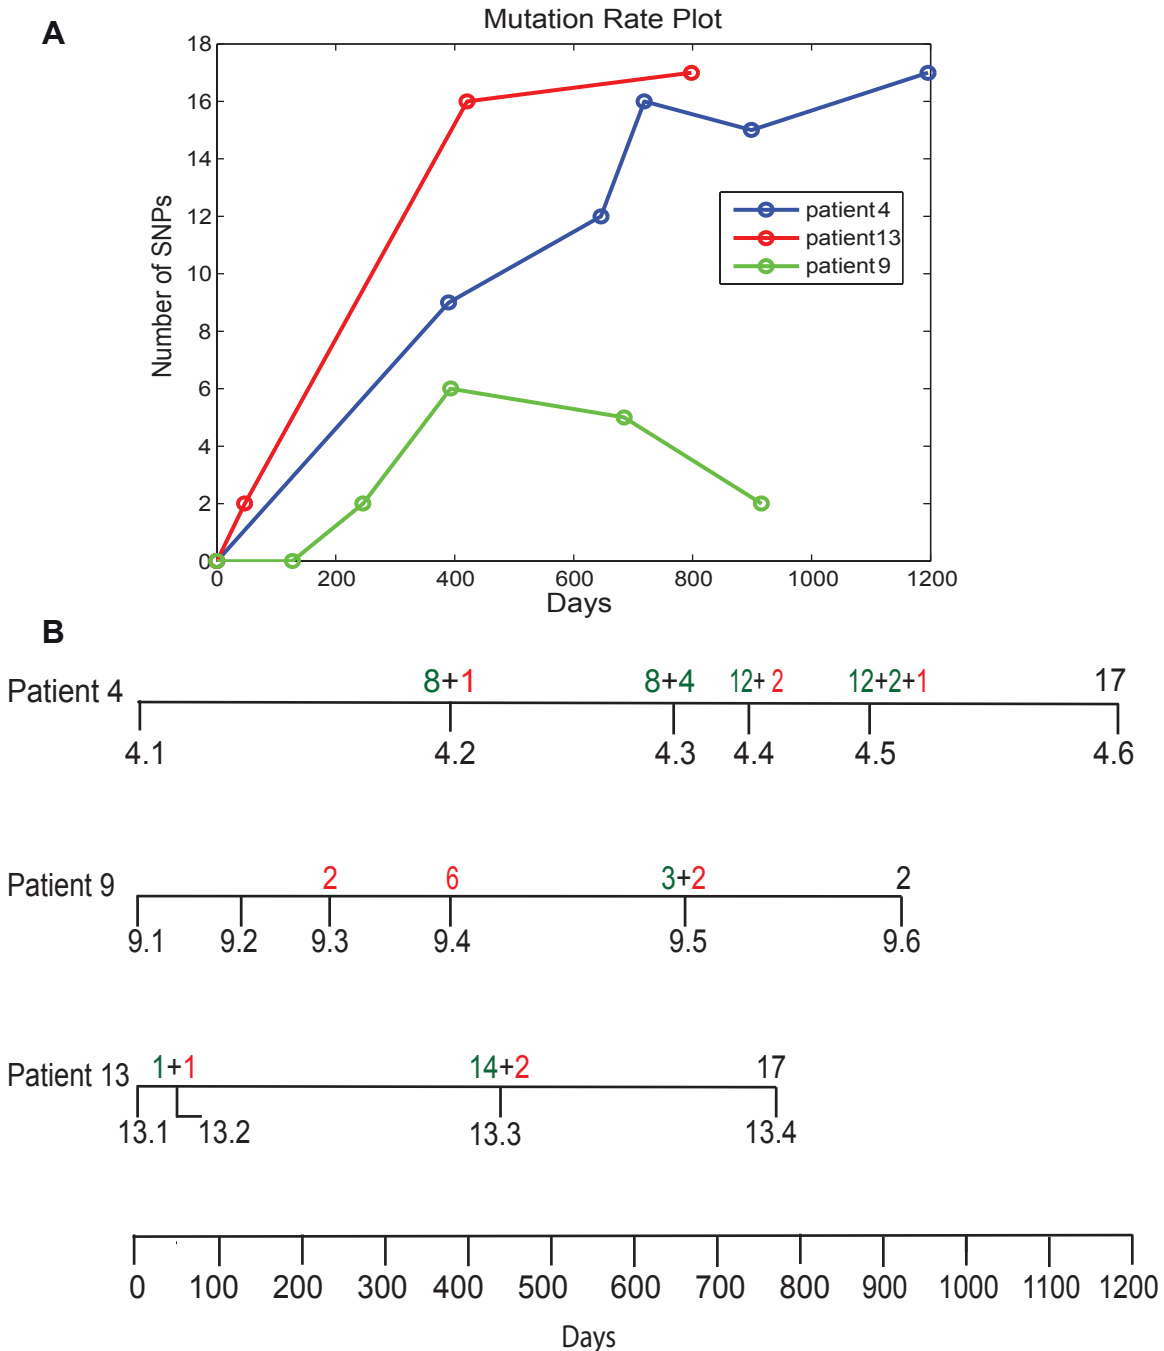

**FIG. 2** SNPs from whole-genome sequencing of Mav clinical isolates sampled over time from single patients. (A) The maximum-likelihood estimate of the rate parameter for clinical isolates from patients 4, 9 and 13 was calculated, assuming a Poisson model for the accumulation of SNPs over time, and represented as a mutation rate plot using Matlab. (B) Diagrammatic representation of the time-line of sample collection from patients 4, 9 and 13 and corresponding SNP development. Number of SNPs in green represents fixed mutations, whereas numbers in red are unique to that particular isolate and are lost in the subsequent isolates.

**A**

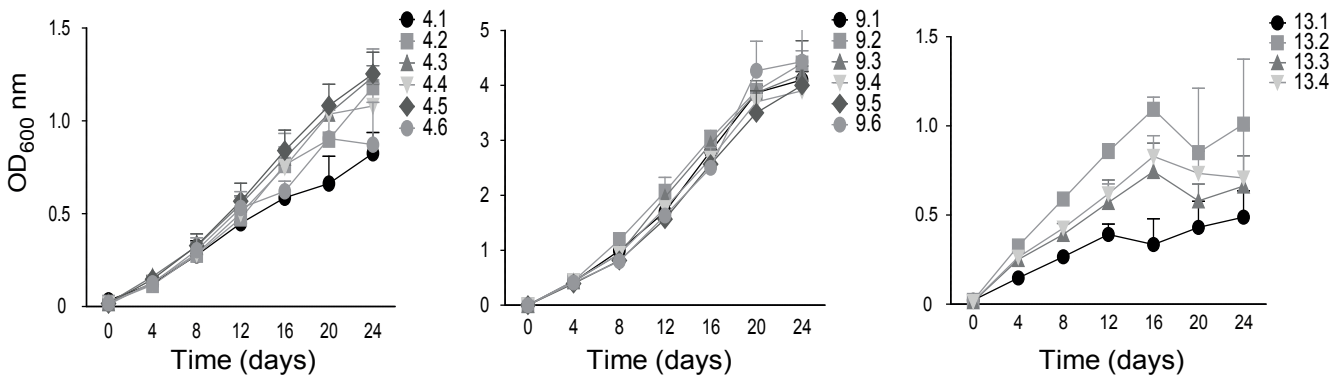

**B**

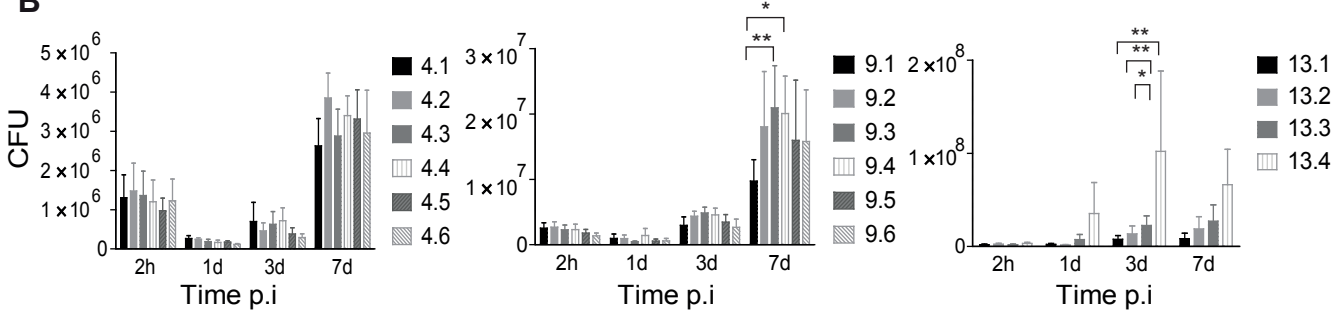

**C**

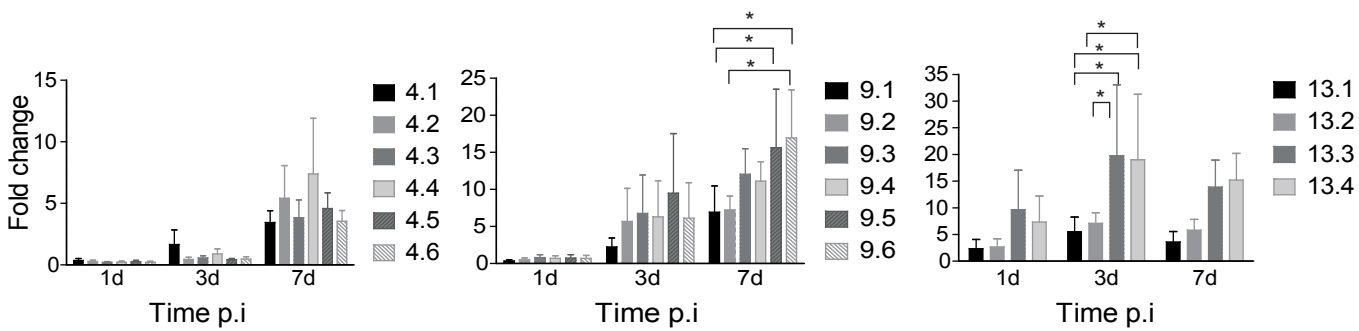

**FIG. 3** Growth in broth and intracellular replication in macrophages of sequential Mav

isolates (A) Growth curves were recorded of sequential Mav isolates from patients 4, 9 and 13

grown for a period of 24 days. Isolates are numbered chronologically from the time they were

collected from the patients. Recordings were performed in triplicates; the OD values show

mean  $\pm$  SEM. (B) Intracellular replication in murine BMDMs infected with isolates from

patients 4, 9 and 13 at a MOI of 10. CFU counts from lysed macrophages were determined 1,

3 and 7 days after infection. (C) Intracellular bacterial counts represented as fold change

normalized to the uptake of bacteria, at 2 hours post exposure /infection. Bars represent mean

$\pm$  SEM from 4 independent experiments; \*  $p < 0.05$ , \*\*  $p < 0.01$  by Repeated measures Two-way

ANOVA, Tukey post-test.

**A**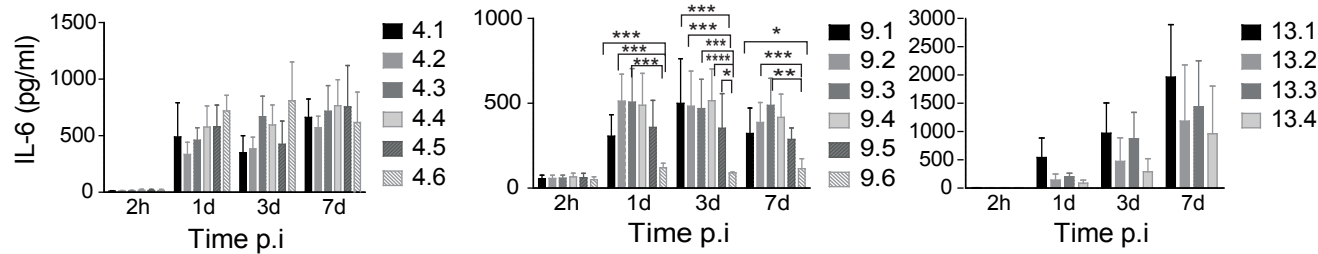**B**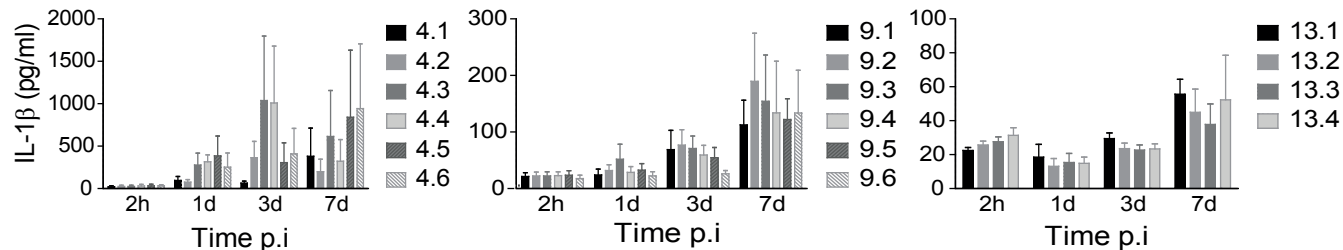

**FIG 4** Down-regulation of pro-inflammatory cytokines in Mav infected mouse macrophages.

Murine BMMs were infected with the sequential Mav isolates from patient 4, 9 and 13 at a

MOI of 10. Levels of IL-6 (A) and IL-1 $\beta$  (B) were measured from supernatants at 2 h, 1 day,

3 days and 7 days post infection (p.i). Bars represent mean  $\pm$  SEM from three or four

independent experiments; \*p<0.05, \*\*p<0.001, \*\*\*p<0.0001 by Repeated measures Two-way

ANOVA, Tukey post-test.

bioRxiv preprint doi: <https://doi.org/10.1101/293121>; this version posted April 5, 2018. The copyright holder for this preprint (which was not certified by peer review) is the author/funder. All rights reserved. No reuse allowed without permission.

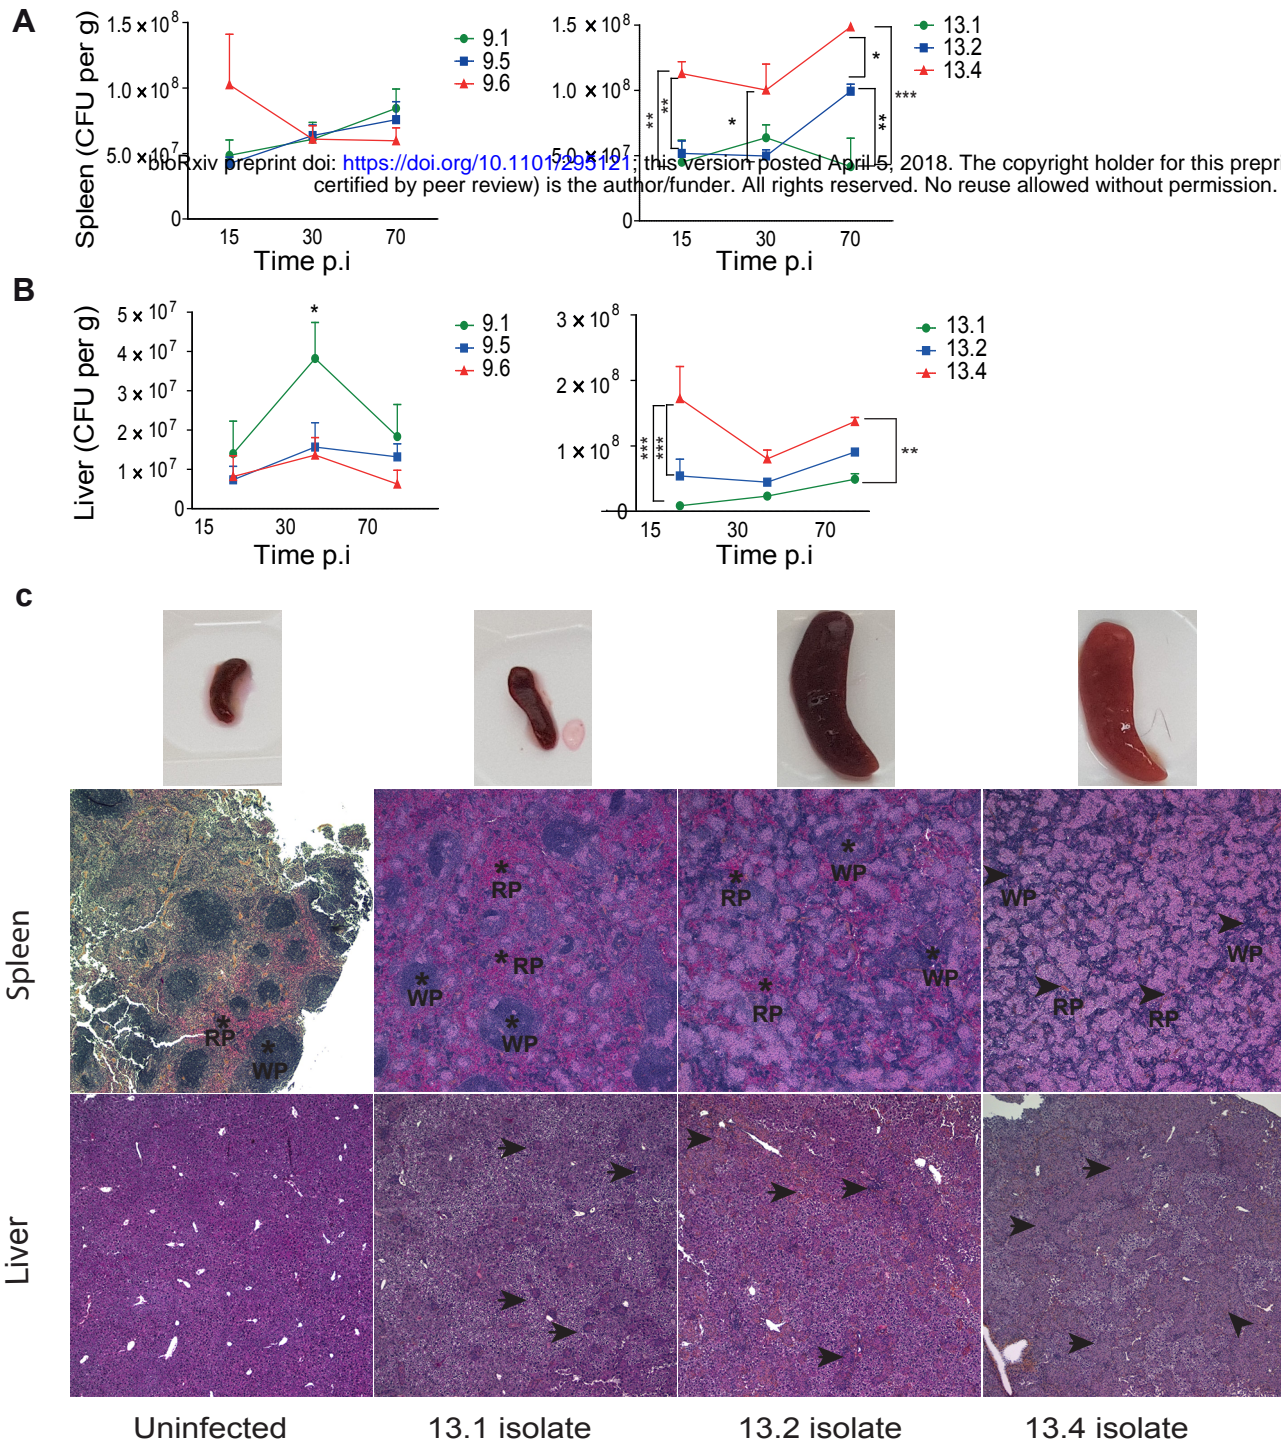

**FIG 5** Mycobacterial load and tissue pathology in mice infected with sequential Mav clinical isolates. (A-B) C57BL/6 mice were infected intraperitoneally with Mav isolates from patient 9 (9.1, 9.5, 9.6) and patient 13 (13.1, 13.2, 13.4) for 15, 30 and 70 days. Tissue bacterial loads in spleen and liver are shown as mean CFUs per gram  $\pm$  SEM from two experiments with four mice in each group. \* $p < 0.05$ , \*\* $< 0.01$ , \*\*\* $< 0.001$  by Repeated Measures Two-way ANOVA and Bonferroni's post-test. (C) Histological examination of spleen and liver from mice infected with Mav isolates 13.1, 13.2 and 13.4 at day 70 post infection. Upper and middle Panel: spleens and spleen tissue histology sections. RP indicates the red pulp and WP the white pulp areas. Lower Panel: liver histology. Arrows point to granulomatous structures. Images are taken at 40x magnification. Experiments done twice with similar results, one representative experiment is shown.

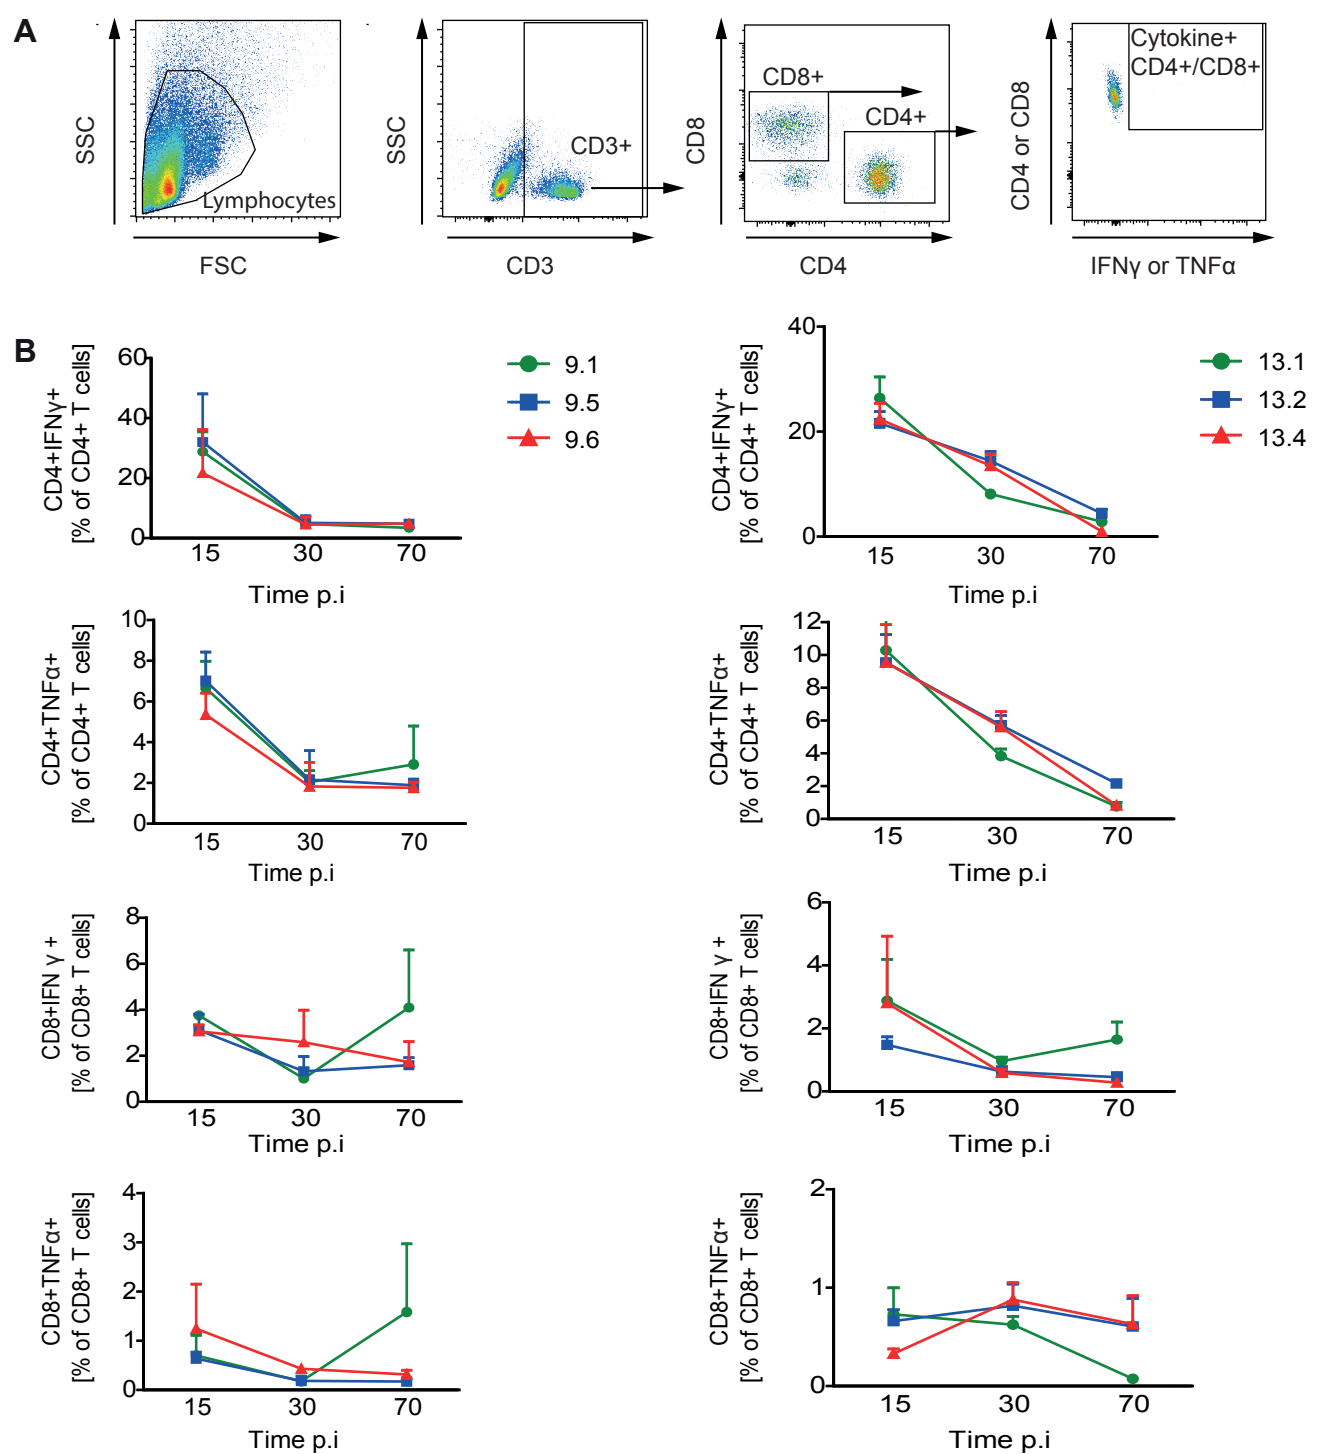

**FIG. 6** Mav-specific splenic T cell responses. C57BL/6 mice were infected with isolates of patient 9 (9.1, 9.5, and 9.6, left) and patient 13 (13.1, 13.2, and 13.4, right) for 15, 30 and 70 days. Mav-specific T cell responses were measured from *in vitro* Mav re-stimulation of splenocytes 15, 30 and 70 days post infection (p.i). IFN $\gamma$  and TNF $\alpha$  production from CD4+ and CD8+ T cells were analyzed by intracellular flow-cytometry. A) Gating strategy. B) Results are represented as percentage of T cells producing the indicated cytokine. Results show mean  $\pm$  SEM of two experiments with four mice analyzed in each group.
